# Supplementary material
Source: publisher figshare collection journal article supplement (https://sage.figshare.com/ndownloader/files/17636513)
Supplement: Supplementary file 1 [file 17636513]

### Supplement 3. Acupuncture treatment details

| Study ID<br>(first author, year) | Acupuncture<br>rationale | Location for the Acupuncture<br>treatment                                                                                  | Needle                       | De-qi     |
|----------------------------------|--------------------------|----------------------------------------------------------------------------------------------------------------------------|------------------------------|-----------|
| Avis 2008 <sup>20</sup>          | TCM                      | CV4 and both KI3, SP6, BL23, HT 6, and KI7 with additional points if necessary (no more than 16 points)                    | 0.22 X 25 mm<br>0.30 X 40 mm | Achieving |
| Avis 2016 <sup>21</sup>          | TCM                      | Not reported (individualized acupuncture)                                                                                  | Not reported                 | Achieving |
| Ee 2016 <sup>22</sup>            | TCM                      | KI6, KI7, SP6, HT6, CV4 and LR3 (6 points)                                                                                 | 0.32 X 40 mm                 | Achieving |
| Huang 2006 <sup>23</sup>         | TCM                      | Selected based on the patient's symptom based on the standardized algorithm (5 to 7 points)                                | Not reported                 | Achieving |
| Kim 2007 <sup>24</sup>           | TCM                      | PC6, HT8, HT7, LI4, ST36, SP6 and CV4                                                                                      | Not reported                 | Achieving |
| Kim 2011 <sup>25</sup>           | TKM                      | PC6, HT8, HT7, LI4, ST36, SP6 and CV4                                                                                      | 30 x 0.3 mm                  | Achieving |
| Nir 2007 <sup>26</sup>           | TCM                      | Selected based on the patient's symptom based on the standardized algorithm (5 to 7 points)                                | Not reported                 | Achieving |
| Painovich 2012 <sup>27</sup>     | Not reported             | DU 20, PC 6, HT 7, LIV 3, LI 4, LI 11, KD 3, SP 6, ST 36, REN 17, REN 6, DU 14, UB 15, UB 18, UB 20, UB 23, GB 34 and KD 3 | Not reported                 | Achieving |

Tx.: Treatment; TCM: traditional Chinese medicine; TKM: traditional Korean medicine
